# Supplementary material for: Lepidium sativum Secondary Metabolites (Essential Oils): In Vitro and In Silico Studies on Human Hepatocellular Carcinoma Cell Lines
Source: MDPI journal article supplement (doi:10.3390/plants10091863), 2021-09-09
Supplement: s1 [file s1]

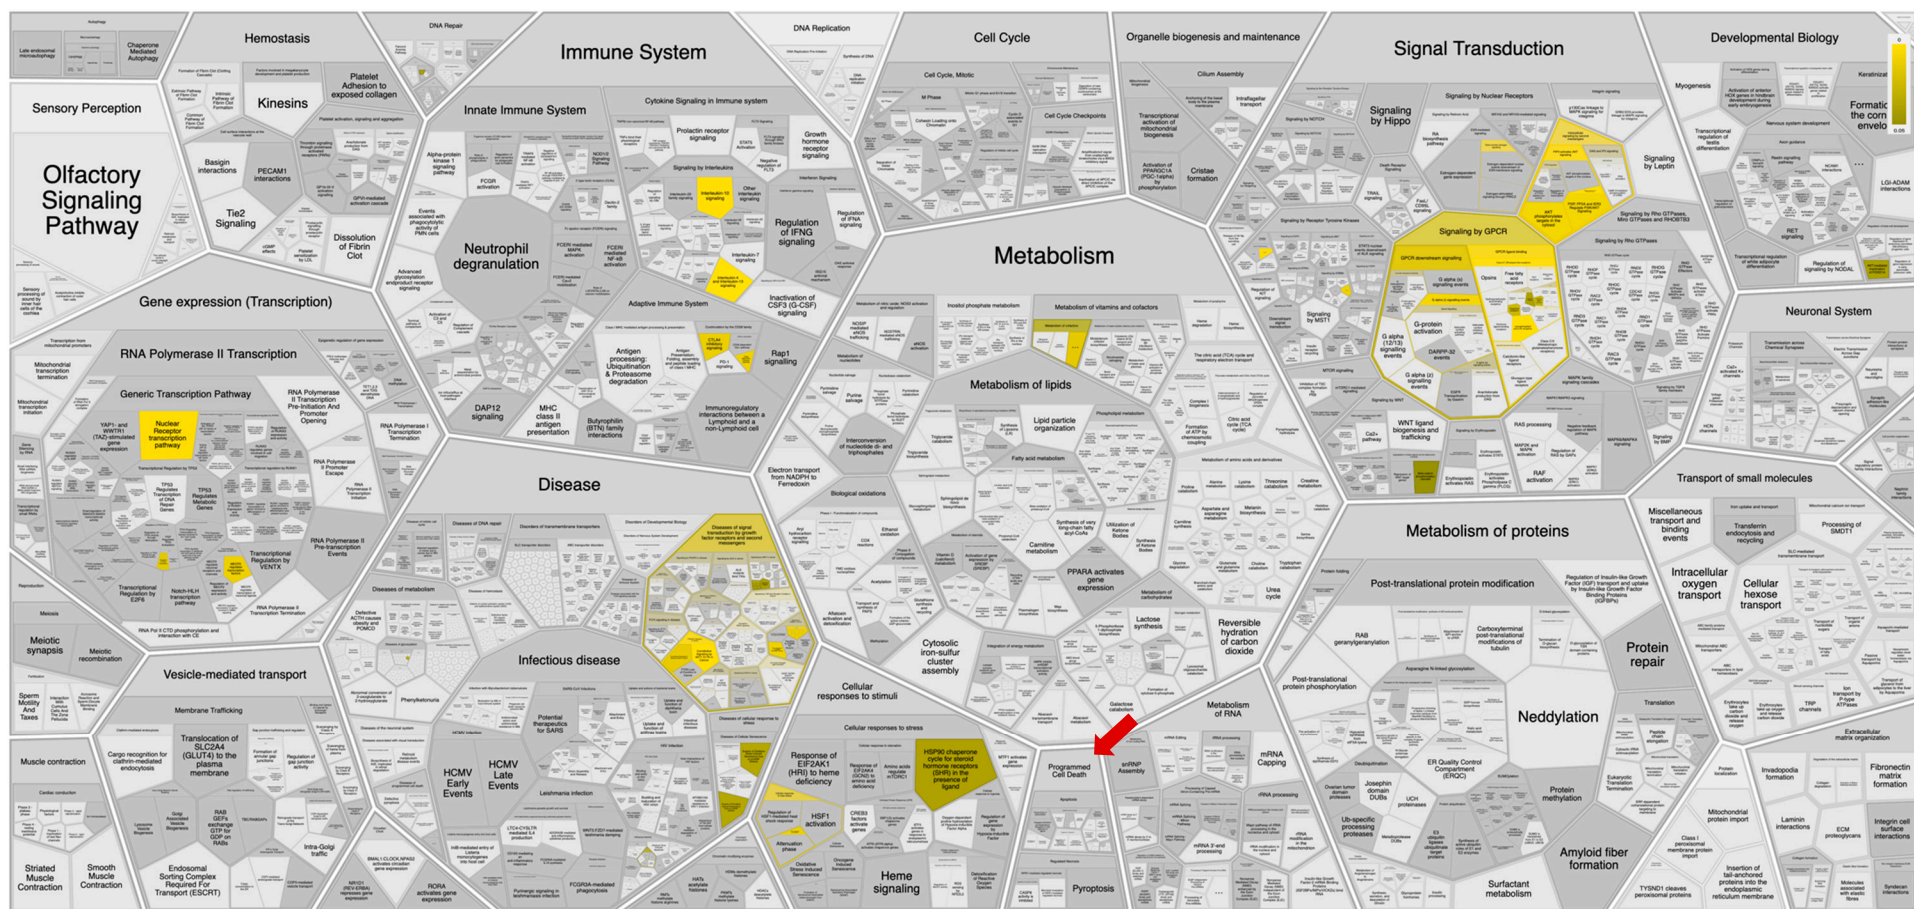

**Figure S2.** A Reactome map of the top enriched pathways affected by the top 20 gene targets in response to compound 29. The yellow color code indicates the over-representation of that pathway in the input dataset. Light grey signifies pathways that are not significantly over-represented.
